# Supplementary material for: Selection Myths
Source: Atypon-hosted journal article supplement (doi:10.1027/1866-5888/a000263), 2020-11-12
Supplement: 1866-5888_a000263_esm1.pdf [file 1866-5888_a000263_esm1.pdf]

**Electronic Supplementary Material for**

**Fisher, P., Risavy, S. D., Robie, C., König, C. J., Christiansen, N. D., Tett, R. P., & Simonet, D. V. (2020). Selection myths: A conceptual replication of HR professionals' beliefs about effective human resource practices. *Journal of Personnel Psychology*. <https://doi.org/10.1027/1866-5888/a000263>**

**Certifications Held by Participants in the Study**

CHRP: Certified Human Resources Professional; CHRL: Certified Human Resources Leader; CHRE: Certified Human Resources Executive; CPHR: Chartered Professional in Human Resources; aPHR™: Associate Professional in Human Resources™; aPHRi™: Associate Professional in Human Resources-International™; PHR®: Professional in Human Resources®; PHRca®: Professional in Human Resources-California®; PHRi™: Professional in Human Resources-International®; SPHR®: Senior Professional in Human Resources®; SPHRi™: Senior Professional in Human Resources-International™; GPHR®: Global Professional in Human Resources®; SHRM-CP: SHRM Certified Professional; SHRM-SCP: SHRM Senior Certified Professional.

**Table E1.** Comparison of potential remedies for the research–practice gap

| Myth                                                                                                                                                                                      | Possess certification<br>% false<br>(% uncertain)<br><i>n</i> = 261 | Don't possess certification<br>% false<br>(% uncertain)<br><i>n</i> = 192 | Difference test                  | Effect size |
|-------------------------------------------------------------------------------------------------------------------------------------------------------------------------------------------|---------------------------------------------------------------------|---------------------------------------------------------------------------|----------------------------------|-------------|
| (1) Although people use many different terms to describe personalities, there are really only four basic dimensions of personality, as captured by the Myers-Briggs Type Indicator (MBTI) | 22.4%<br>(27.6%)<br><i>M</i> = 1.78<br><i>SD</i> = 1.28             | 18.4%<br>(32.2%)<br><i>M</i> = 1.80<br><i>SD</i> = 1.23                   | $F(1, 451) = .06$<br>$p = .810$  | $d = .02$   |
| (2) Conscientiousness is a better predictor of overall job performance than general mental ability/IQ                                                                                     | 17.2%<br>(25.0%)<br><i>M</i> = 1.98<br><i>SD</i> = 1.23             | 21.5%<br>(26.1%)<br><i>M</i> = 1.84<br><i>SD</i> = 1.27                   | $F(1, 451) = 1.56$<br>$p = .213$ | $d = .11$   |
| (3) Companies that screen job applicants for values have higher overall job performance than those that screen for general mental ability/IQ                                              | 18.8%<br>(17.2%)<br><i>M</i> = 2.08<br><i>SD</i> = 1.25             | 17.2%<br>(23.4%)<br><i>M</i> = 2.02<br><i>SD</i> = 1.23                   | $F(1, 451) = .44$<br>$p = .507$  | $d = .05$   |
| (4) Integrity tests don't work well in practice because so many people lie on them                                                                                                        | 19.8%<br>(29.7%)<br><i>M</i> = 1.81<br><i>SD</i> = 1.25             | 25.3%<br>(31.4%)<br><i>M</i> = 1.61<br><i>SD</i> = 1.27                   | $F(1, 451) = 2.76$<br>$p = .097$ | $d = .16$   |
| (5) Integrity tests have adverse impact on racial minorities                                                                                                                              | 39.8%<br>(34.6%)<br><i>M</i> = 1.12<br><i>SD</i> = 1.19             | 31.8%<br>(47.5%)<br><i>M</i> = 1.10<br><i>SD</i> = 1.07                   | $F(1, 450) = .03$<br>$p = .856$  | $d = .02$   |
| (6) The most valid employment interviews are designed around an applicant's unique background                                                                                             | 22.9%<br>(17.7%)<br><i>M</i> = 1.96<br><i>SD</i> = 1.30             | 25.8%<br>(16.9%)<br><i>M</i> = 1.89<br><i>SD</i> = 1.33                   | $F(1, 450) = .31$<br>$p = .578$  | $d = .05$   |
| (7) Being very intelligent is actually a disadvantage for performing well on a low-skilled job                                                                                            | 53.6%<br>(16.1%)<br><i>M</i> = 1.07<br><i>SD</i> = 1.32             | 45.0%<br>(23.5%)<br><i>M</i> = 1.18<br><i>SD</i> = 1.30                   | $F(1, 450) = .82$<br>$p = .364$  | $d = .08$   |
| (8) There is very little difference among personality inventories in terms of how well they predict an applicant's overall job performance                                                | 45.3%<br>(20.3%)<br><i>M</i> = 1.23<br><i>SD</i> = 1.34             | 33.1%<br>(33.1%)<br><i>M</i> = 1.35<br><i>SD</i> = 1.25                   | $F(1, 450) = .83$<br>$p = .362$  | $d = .09$   |
| (9) Emotional intelligence is a better predictor of overall job performance than general mental ability/IQ                                                                                | 29.7%<br>(15.6%)<br><i>M</i> = 1.80<br><i>SD</i> = 1.36             | 25.3%<br>(23.4%)<br><i>M</i> = 1.77<br><i>SD</i> = 1.31                   | $F(1, 451) = .03$<br>$p = .856$  | $d = .02$   |
| (10) A skilled graphologist (i.e., handwriting analysis expert) can be helpful in predicting overall job performance                                                                      | 47.9%<br>(27.6%)<br><i>M</i> = 1.01<br><i>SD</i> = 1.21             | 46.4%<br>(33.0%)<br><i>M</i> = .95<br><i>SD</i> = 1.14                    | $F(1, 451) = .29$<br>$p = .588$  | $d = .05$   |

Table E1 continued

| Myth | Hold traditional HR job<br>% false<br>(% uncertain)<br><i>n</i> = 288 | Hold non-traditional HR job<br>% false<br>(% uncertain)<br><i>n</i> = 156 | Difference test                                          | Effect size    |
|------|-----------------------------------------------------------------------|---------------------------------------------------------------------------|----------------------------------------------------------|----------------|
| (1)  | 22.9%<br>(32.6%)<br><i>M</i> = 1.66<br><i>SD</i> = 1.26               | 14.7%<br>(25.6%)<br><i>M</i> = 2.04<br><i>SD</i> = 1.20                   | <b><i>F</i>(1, 442) = 9.80</b><br><b><i>p</i> = .002</b> | <i>d</i> = .31 |
| (2)  | 19.4%<br>(26.4%)<br><i>M</i> = 1.89<br><i>SD</i> = 1.26               | 19.2%<br>(23.7%)<br><i>M</i> = 1.95<br><i>SD</i> = 1.26                   | <i>F</i> (1, 442) = .23<br><i>p</i> = .632               | <i>d</i> = .05 |
| (3)  | 18.1%<br>(23.3%)<br><i>M</i> = 1.99<br><i>SD</i> = 1.24               | 16.7%<br>(15.4%)<br><i>M</i> = 2.19<br><i>SD</i> = 1.21                   | <i>F</i> (1, 442) = 2.64<br><i>p</i> = .105              | <i>d</i> = .16 |
| (4)  | 21.9%<br>(33.0%)<br><i>M</i> = 1.68<br><i>SD</i> = 1.25               | 25.0%<br>(25.6%)<br><i>M</i> = 1.74<br><i>SD</i> = 1.30                   | <i>F</i> (1, 442) = .18<br><i>p</i> = .673               | <i>d</i> = .05 |
| (5)  | 34.4%<br>(45.1%)<br><i>M</i> = 1.07<br><i>SD</i> = 1.08               | 38.1%<br>(35.5%)<br><i>M</i> = 1.15<br><i>SD</i> = 1.19                   | <i>F</i> (1, 441) = .55<br><i>p</i> = .461               | <i>d</i> = .07 |
| (6)  | 22.6%<br>(15.3%)<br><i>M</i> = 2.02<br><i>SD</i> = 1.30               | 27.6%<br>(20.5%)<br><i>M</i> = 1.76<br><i>SD</i> = 1.33                   | <i>F</i> (1, 442) = 3.82<br><i>p</i> = .051              | <i>d</i> = .20 |
| (7)  | 49.7%<br>(20.1%)<br><i>M</i> = 1.11<br><i>SD</i> = 1.30               | 47.4%<br>(20.5%)<br><i>M</i> = 1.17<br><i>SD</i> = 1.32                   | <i>F</i> (1, 442) = .21<br><i>p</i> = .650               | <i>d</i> = .05 |
| (8)  | 38.5%<br>(28.1%)<br><i>M</i> = 1.28<br><i>SD</i> = 1.28               | 37.8%<br>(26.3%)<br><i>M</i> = 1.33<br><i>SD</i> = 1.30                   | <i>F</i> (1, 442) = .13<br><i>p</i> = .722               | <i>d</i> = .04 |
| (9)  | 25.7%<br>(19.8%)<br><i>M</i> = 1.83<br><i>SD</i> = 1.32               | 30.8%<br>(19.2%)<br><i>M</i> = 1.69<br><i>SD</i> = 1.36                   | <i>F</i> (1, 442) = 1.13<br><i>p</i> = .288              | <i>d</i> = .10 |
| (10) | 48.3%<br>(33.7%)<br><i>M</i> = .88<br><i>SD</i> = 1.09                | 44.9%<br>(25.6%)<br><i>M</i> = 1.14<br><i>SD</i> = 1.27                   | <i>F</i> (1, 442) = 5.19<br><i>p</i> = .023              | <i>d</i> = .22 |

Table E1 continued

| Myth | Read peer-reviewed journal articles<br>% false<br>(% uncertain)<br><i>n</i> = 257 | Don't read peer-reviewed journal articles<br>% false<br>(% uncertain)<br><i>n</i> = 195 | Difference test                                                      | Effect size |
|------|-----------------------------------------------------------------------------------|-----------------------------------------------------------------------------------------|----------------------------------------------------------------------|-------------|
| (1)  | 20.6%<br>(26.1%)<br><i>M</i> = 1.86<br><i>SD</i> = 1.27                           | 19.5%<br>(35.9%)<br><i>M</i> = 1.70<br><i>SD</i> = 1.23                                 | $F(1, 450) = 1.88$<br>$p = .171$                                     | $d = .13$   |
| (2)  | 19.5%<br>(19.1%)<br><i>M</i> = 2.04<br><i>SD</i> = 1.26                           | 20.0%<br>(34.4%)<br><i>M</i> = 1.71<br><i>SD</i> = 1.24                                 | <b><math>F(1, 450) = 7.37</math></b><br><b><math>p = .007</math></b> | $d = .26$   |
| (3)  | 19.1%<br>(15.2%)<br><i>M</i> = 2.12<br><i>SD</i> = 1.25                           | 16.4%<br>(28.2%)<br><i>M</i> = 1.94<br><i>SD</i> = 1.22                                 | $F(1, 450) = 2.37$<br>$p = .125$                                     | $d = .15$   |
| (4)  | 24.5%<br>(30.4%)<br><i>M</i> = 1.66<br><i>SD</i> = 1.27                           | 21.0%<br>(31.3%)<br><i>M</i> = 1.74<br><i>SD</i> = 1.25                                 | $F(1, 450) = .51$<br>$p = .475$                                      | $d = .06$   |
| (5)  | 36.2%<br>(37.0%)<br><i>M</i> = 1.18<br><i>SD</i> = 1.19                           | 33.8%<br>(48.7%)<br><i>M</i> = 1.01<br><i>SD</i> = 1.02                                 | $F(1, 450) = 2.41$<br>$p = .121$                                     | $d = .15$   |
| (6)  | 22.3%<br>(13.7%)<br><i>M</i> = 2.06<br><i>SD</i> = 1.29                           | 27.7%<br>(22.1%)<br><i>M</i> = 1.73<br><i>SD</i> = 1.33                                 | <b><math>F(1, 449) = 7.06</math></b><br><b><math>p = .008</math></b> | $d = .25$   |
| (7)  | 46.5%<br>(18.8%)<br><i>M</i> = 1.23<br><i>SD</i> = 1.35                           | 51.8%<br>(22.6%)<br><i>M</i> = .99<br><i>SD</i> = 1.25                                  | $F(1, 449) = 3.62$<br>$p = .058$                                     | $d = .18$   |
| (8)  | 35.2%<br>(26.6%)<br><i>M</i> = 1.41<br><i>SD</i> = 1.31                           | 42.6%<br>(29.2%)<br><i>M</i> = 1.14<br><i>SD</i> = 1.24                                 | $F(1, 449) = 5.12$<br>$p = .024$                                     | $d = .21$   |
| (9)  | 30.0%<br>(16.7%)<br><i>M</i> = 1.77<br><i>SD</i> = 1.36                           | 23.6%<br>(24.1%)<br><i>M</i> = 1.81<br><i>SD</i> = 1.30                                 | $F(1, 450) = .12$<br>$p = .730$                                      | $d = .03$   |
| (10) | 47.1%<br>(26.1%)<br><i>M</i> = 1.07<br><i>SD</i> = 1.24                           | 47.2%<br>(36.9%)<br><i>M</i> = .85<br><i>SD</i> = 1.04                                  | $F(1, 450) = 3.98$<br>$p = .047$                                     | $d = .19$   |

Table E1 continued

| Myth | Conduct validity studies<br>% false<br>(% uncertain)<br><i>n</i> = 171 | Don't conduct validity studies<br>% false<br>(% uncertain)<br><i>n</i> = 245 | Difference test                                              | Effect size    |
|------|------------------------------------------------------------------------|------------------------------------------------------------------------------|--------------------------------------------------------------|----------------|
| (1)  | 15.2%<br>(21.1%)<br><i>M</i> = 2.12<br><i>SD</i> = 1.20                | 23.7%<br>(33.5%)<br><i>M</i> = 1.62<br><i>SD</i> = 1.25                      | <b><i>F</i>(1, 414) = 16.70</b><br><b><i>p</i> &lt; .001</b> | <i>d</i> = .42 |
| (2)  | 21.1%<br>(19.3%)<br><i>M</i> = 1.98<br><i>SD</i> = 1.28                | 20.0%<br>(27.3%)<br><i>M</i> = 1.85<br><i>SD</i> = 1.26                      | <i>F</i> (1, 414) = 1.05<br><i>p</i> = .306                  | <i>d</i> = .10 |
| (3)  | 17.5%<br>(10.5%)<br><i>M</i> = 2.26<br><i>SD</i> = 1.21                | 18.8%<br>(26.5%)<br><i>M</i> = 1.91<br><i>SD</i> = 1.25                      | <b><i>F</i>(1, 414) = 8.44</b><br><b><i>p</i> = .004</b>     | <i>d</i> = .28 |
| (4)  | 28.7%<br>(25.1%)<br><i>M</i> = 1.64<br><i>SD</i> = 1.32                | 19.2%<br>(33.1%)<br><i>M</i> = 1.76<br><i>SD</i> = 1.24                      | <i>F</i> (1, 414) = .99<br><i>p</i> = .321                   | <i>d</i> = .09 |
| (5)  | 39.4%<br>(25.3%)<br><i>M</i> = 1.31<br><i>SD</i> = 1.31                | 33.1%<br>(50.6%)<br><i>M</i> = 1.00<br><i>SD</i> = 1.00                      | <b><i>F</i>(1, 413) = 7.78</b><br><b><i>p</i> = .006</b>     | <i>d</i> = .27 |
| (6)  | 19.4%<br>(12.9%)<br><i>M</i> = 2.16<br><i>SD</i> = 1.25                | 27.8%<br>(18.8%)<br><i>M</i> = 1.79<br><i>SD</i> = 1.34                      | <b><i>F</i>(1, 413) = 7.94</b><br><b><i>p</i> = .005</b>     | <i>d</i> = .29 |
| (7)  | 45.9%<br>(10.6%)<br><i>M</i> = 1.41<br><i>SD</i> = 1.43                | 51.8%<br>(23.7%)<br><i>M</i> = .97<br><i>SD</i> = 1.23                       | <b><i>F</i>(1, 413) = 11.29</b><br><b><i>p</i> = .001</b>    | <i>d</i> = .33 |
| (8)  | 34.7%<br>(18.8%)<br><i>M</i> = 1.58<br><i>SD</i> = 1.37                | 40.4%<br>(32.7%)<br><i>M</i> = 1.13<br><i>SD</i> = 1.21                      | <b><i>F</i>(1, 413) = 12.29</b><br><b><i>p</i> = .001</b>    | <i>d</i> = .35 |
| (9)  | 28.1%<br>(11.7%)<br><i>M</i> = 1.92<br><i>SD</i> = 1.36                | 26.9%<br>(23.7%)<br><i>M</i> = 1.72<br><i>SD</i> = 1.32                      | <i>F</i> (1, 414) = 2.39<br><i>p</i> = .123                  | <i>d</i> = .15 |
| (10) | 43.3%<br>(22.8%)<br><i>M</i> = 1.25<br><i>SD</i> = 1.32                | 51.4%<br>(33.9%)<br><i>M</i> = .78<br><i>SD</i> = 1.03                       | <b><i>F</i>(1, 414) = 16.35</b><br><b><i>p</i> &lt; .001</b> | <i>d</i> = .40 |

Note. Bolded values are significant at  $p < .05$ , corrected for false discovery rate according to Benjamini and Hochberg (1995).
